# Supplementary material for: Emerging Socioeconomic Disparities in COVID-19 Vaccine Second-Dose Completion Rates in the United States
Source: MDPI journal article supplement (doi:10.3390/vaccines10010121), 2022-01-14
Supplement: s1 [file s1]

## Supplementary Materials

**Table S1.** COVID-19 Vaccination Initiation and Completion Rates by Demographics, Stratified by Healthcare Worker Status.

| Demographic             | Healthcare Workers            |                                                        |                                                        | Non-Healthcare Workers        |                                                        |                                                        |
|-------------------------|-------------------------------|--------------------------------------------------------|--------------------------------------------------------|-------------------------------|--------------------------------------------------------|--------------------------------------------------------|
|                         | Total <sup>a</sup><br>No. (%) | Dose Initiation <sup>b</sup><br>(95% MOE) <sup>c</sup> | Dose Completion <sup>b</sup><br>(95% MOE) <sup>c</sup> | Total <sup>a</sup><br>No. (%) | Dose Initiation <sup>b</sup><br>(95% MOE) <sup>c</sup> | Dose Completion <sup>b</sup><br>(95% MOE) <sup>c</sup> |
| Age (years)             |                               |                                                        |                                                        |                               |                                                        |                                                        |
| 18–34                   | 25,581 (17.9)                 | 60.9 (60.1–61.7)                                       | 88.5 (87.7–89.3)                                       | 125,748 (17.9)                | 41.8 (41.4–42.2)                                       | 80.8 (80.4–81.2)                                       |
| 35–44                   | 28,926 (20.3)                 | 70.0 (69.3–70.7)                                       | 91.3 (90.5–92.1)                                       | 105,400 (15.0)                | 47.7 (47.3–48.1)                                       | 82.8 (82.4–83.2)                                       |
| 45–54                   | 36,591 (25.6)                 | 77.8 (77.2–78.4)                                       | 91.7 (91.1–92.3)                                       | 131,355 (18.7)                | 57.6 (57.2–58.0)                                       | 84.3 (84.0–84.6)                                       |
| 55–64                   | 36,800 (25.8)                 | 84.8 (84.3–85.3)                                       | 93.3 (92.8–93.8)                                       | 156,274 (22.3)                | 67.9 (67.6–68.2)                                       | 84.8 (84.5–85.1)                                       |
| ≥ 65                    | 14,605 (10.2)                 | 88.8 (88.1–89.5)                                       | 93.5 (92.7–94.3)                                       | 170,989 (24.4)                | 81.9 (81.7–82.1)                                       | 87.0 (86.8–87.2)                                       |
| Missing                 | 236 (0.20)                    | Suppressed <sup>d</sup>                                | Suppressed <sup>d</sup>                                | 11,480 (1.6)                  | Suppressed <sup>d</sup>                                | Suppressed <sup>d</sup>                                |
| Race                    |                               |                                                        |                                                        |                               |                                                        |                                                        |
| White                   | 88,557 (62.0)                 | 75.1 (74.7–75.5)                                       | 92.8 (92.5–93.1)                                       | 468,511 (66.8)                | 58.9 (58.7–59.1)                                       | 85.1 (84.9–85.3)                                       |
| Black                   | 22,961 (16.1)                 | 63.1 (62.1–64.1)                                       | 86.7 (85.9–87.5)                                       | 92,304 (13.2)                 | 48.5 (48.0–49.0)                                       | 80.8 (80.3–81.3)                                       |
| Hispanic                | 14,421 (10.1)                 | 70.3 (69.1–71.5)                                       | 89.0 (88.1–89.9)                                       | 72,684 (10.4)                 | 51.2 (50.7–51.7)                                       | 80.9 (80.3–81.5)                                       |
| Asian                   | 9,275 (6.5)                   | 86.9 (86.7–87.0)                                       | 92.1 (91.2–93.0)                                       | 31,288 (4.5)                  | 65.6 (64.8–66.4)                                       | 83.5 (82.8–84.2)                                       |
| Other                   | 7,525 (5.3)                   | 61.9 (60.2–63.6)                                       | 90.3 (89.0–91.6)                                       | 36,459 (5.2)                  | 44.9 (44.1–45.7)                                       | 82.8 (82.0–83.6)                                       |
| Essential Worker        |                               |                                                        |                                                        |                               |                                                        |                                                        |
| Yes                     | 118,515 (83.0)                | 74.3 (73.9–74.7)                                       | 92.0 (91.6–92.4)                                       | 260,567 (37.2)                | 53.3 (53.0–53.6)                                       | 84.2 (83.9–84.5)                                       |
| No                      | 23,876 (16.7)                 | 68.4 (67.5–69.3)                                       | 88.4 (87.7–89.1)                                       | 176,508 (25.2)                | 60.5 (60.2–60.8)                                       | 84.3 (84.0–84.6)                                       |
| Missing                 | 347 (0.2)                     | 65.1 (57.3–72.9)                                       | 88.7 (82.5–94.9)                                       | 264,171 (37.7)                | 51.9 (49.8–54.0)                                       | 86.2 (84.3–88.1)                                       |
| Annual Household Income |                               |                                                        |                                                        |                               |                                                        |                                                        |
| <30,000                 | 18,189 (12.7)                 | 55.7 (55.6–55.8)                                       | 84.9 (83.8–86.0)                                       | 138,166 (19.7)                | 43.0 (42.6–43.4)                                       | 79.8 (79.3–80.3)                                       |
| 30–49,999               | 20,601 (14.4)                 | 67.1 (66.1–68.1)                                       | 88.6 (87.8–89.4)                                       | 96,677 (13.8)                 | 53.8 (53.3–54.3)                                       | 82.8 (82.3–83.3)                                       |
| 50–74,999               | 23,330 (16.3)                 | 73.9 (73.0–74.8)                                       | 91.2 (90.6–91.8)                                       | 110,009 (15.7)                | 58.3 (57.9–58.7)                                       | 84.2 (83.8–84.6)                                       |
| 75–99,999               | 20,585 (14.4)                 | 77.5 (76.6–78.4)                                       | 92.7 (92.1–93.3)                                       | 89,608 (12.8)                 | 61.4 (60.9–61.9)                                       | 85.0 (84.6–85.4)                                       |
| 100–150,000             | 26,218 (18.4)                 | 81.2 (80.8–81.6)                                       | 93.6 (93.1–94.1)                                       | 110,663 (15.8)                | 64.4 (64.0–64.8)                                       | 85.6 (85.2–86.0)                                       |
| >150,000                | 26,289 (18.5)                 | 86.2 (85.6–86.8)                                       | 95.3 (94.9–95.7)                                       | 107,779 (15.4)                | 67.9 (67.5–68.3)                                       | 86.7 (86.3–87.1)                                       |

|                       |               |                  |                  |                |                  |                  |
|-----------------------|---------------|------------------|------------------|----------------|------------------|------------------|
| Missing               | 7427 (5.2)    | 75.8 (74.3–77.3) | 92.2 (91.1–93.3) | 48,344 (6.9)   | 62.8 (62.1–63.5) | 85.1 (84.5–85.7) |
| Health Insurance      |               |                  |                  |                |                  |                  |
| Plan through employer | 89,355 (62.6) | 78.2 (77.8–78.6) | 93.3 (93.0–93.6) | 310,601 (44.3) | 59.2 (58.9–59.5) | 84.7 (84.5–84.9) |
| Medicare              | 11,288 (7.9)  | 69.2 (67.9–70.5) | 89.6 (88.6–90.6) | 160,661 (22.9) | 67.5 (67.2–67.8) | 85.4 (85.1–85.7) |
| Self-purchased plan   | 18,366 (12.9) | 72.2 (71.2–73.2) | 90.2 (89.4–91.0) | 73,414 (10.5)  | 56.1 (55.6–56.6) | 84.2 (83.7–84.7) |
| Medicaid or Medi-Cal  | 6643 (4.7)    | 53.8 (51.9–55.7) | 83.9 (81.1–86.8) | 51,297 (7.3)   | 40.4 (39.8–41.0) | 79.1 (78.3–79.9) |
| Tricare               | 2188 (1.5)    | 71.5 (68.6–74.5) | 92.1 (90.1–94.1) | 13,372 (1.9)   | 58.8 (57.5–60.1) | 84.5 (83.4–85.6) |
| Other                 | 7810 (5.5)    | 70.8 (69.2–72.4) | 87.0 (85.7–88.4) | 42,039 (6.0)   | 52.9 (52.2–53.6) | 81.8 (81.1–82.5) |
| Uninsured             | 5800 (4.1)    | 52.0 (50.0–54.0) | 83.5 (81.5–85.5) | 40,170 (5.7)   | 33.5 (32.8–34.2) | 77.0 (76.0–78.0) |
| Missing               | 1289 (0.9)    | 66.3 (62.3–70.3) | 90.0 (87.0–93.0) | 9692 (1.4)     | 47.4 (45.9–48.9) | 82.1 (80.6–83.7) |
| Political Party       |               |                  |                  |                |                  |                  |
| Republican            | 33,182 (23.2) | 68.5 (67.7–69.3) | 91.9 (91.4–92.4) | 155,519 (22.2) | 52.2 (51.8–52.6) | 84.4 (84.0–84.8) |
| Democrat              | 56,021 (39.2) | 81.8 (81.3–82.3) | 91.7 (91.3–92.1) | 276,405 (39.4) | 67.2 (67.0–67.4) | 84.3 (84.1–84.5) |
| Independent           | 45,941 (32.2) | 69.4 (68.7–70.1) | 90.9 (90.4–91.4) | 235,409 (33.6) | 50.3 (50.0–50.6) | 83.0 (82.7–83.3) |
| Missing               | 7595 (5.3)    | 72.4 (70.8–74.0) | 90.6 (89.4–91.8) | 33,913 (4.8)   | 53.9 (53.2–54.7) | 83.2 (82.4–84.0) |

<sup>a</sup> Crude, unweighted responses; <sup>b</sup> rates are weighted for gender, age, race, education, geography, profession, and political identification to match national general population; <sup>c</sup> margin of error (MOE); <sup>d</sup> sub-groups with insufficient numbers of responses were suppressed.

**Table S2.** Full Regression Output for Association between Annual Household Income and COVID-19 Vaccine Completion.

| Demographic             | AOR <sup>a</sup> | 95% CI     | <i>p</i> -Value |
|-------------------------|------------------|------------|-----------------|
| Annual Household Income |                  |            |                 |
| <30,000                 | 0.82             | 0.78–0.86  | <0.001          |
| 30–49,999               | 0.92             | 0.88–0.96  | <0.001          |
| 50–74,999               | REF              | --         | --              |
| 75–99,999               | 1.07             | 1.03–1.11  | <0.001          |
| 100–150,000             | 1.13             | 1.10–1.16  | <0.001          |
| >150,000                | 1.20             | 1.17–1.23  | <0.001          |
| Missing                 | 1.06             | 1.01–1.11  | 0.05            |
| Age (years)             |                  |            |                 |
| 18–34                   | 0.87             | 0.84–0.90  | <0.001          |
| 35–44                   | 0.95             | 0.92–0.98  | 0.01            |
| 45–54                   | REF              | --         | --              |
| 55–64                   | 1.02             | 0.99–1.05  | 1.00            |
| ≥ 65                    | 1.23             | 1.19–1.27  | <0.001          |
| Missing                 | 0.08             | -2.33–2.49 | 0.05            |
| Race                    |                  |            |                 |
| White                   | REF              | --         | --              |
| Black                   | 0.77             | 0.74–0.80  | <0.001          |
| Hispanic                | 0.93             | 0.90–0.96  | <0.001          |
| Asian                   | 0.97             | 0.93–1.01  | 1.00            |
| Other                   | 0.90             | 0.85–0.95  | <0.001          |
| Essential Worker        |                  |            |                 |
| Yes                     | REF              | --         | --              |
| No                      | 1.13             | 1.11–1.15  | <0.001          |
| Missing                 | 1.17             | 1.05–1.29  | 0.01            |
| Industry                |                  |            |                 |
| Healthcare              | REF              | --         | --              |
| Education               | 0.48             | 0.45–0.51  | <0.001          |
| Government              | 0.57             | 0.53–0.61  | <0.001          |
| Other                   | 0.50             | 0.47–0.53  | <0.001          |
| Missing                 | 0.63             | 0.58–0.68  | <0.001          |
| Health Insurance        |                  |            |                 |
| Plan through employer   | REF              | --         | --              |
| Medicare                | 0.90             | 0.86–0.94  | <0.001          |
| Self-purchased plan     | 0.95             | 0.92–0.98  | <0.001          |
| Medicaid or Medi-Cal    | 0.82             | 0.77–0.87  | <0.001          |
| Tricare                 | 1.04             | 0.97–1.11  | 1.00            |
| Other                   | 0.81             | 0.77–0.85  | <0.001          |
| Uninsured               | 0.71             | 0.66–0.76  | <0.001          |
| Missing                 | 0.85             | 0.76–0.94  | <0.001          |
| Political Party         |                  |            |                 |
| Republican              | 0.89             | 0.86–0.92  | <0.001          |
| Democrat                | REF              | --         | --              |
| Independent             | 0.92             | 0.90–0.94  | <0.001          |
| Missing                 | 0.85             | 0.80–0.90  | <0.001          |

<sup>a</sup> Adjusted odds ratio (AOR); adjusted for annual income, age, race, essential worker status, professional industry, health insurance coverage, and political party.

**Table S3.** Full Regression Output for Association between Annual Household Income and COVID-19 Vaccine Completion, Stratified by Healthcare Worker Status.

| Demographic             | Healthcare Worker |           |                 | Non-Healthcare Worker |            |                 |
|-------------------------|-------------------|-----------|-----------------|-----------------------|------------|-----------------|
|                         | AOR <sup>a</sup>  | 95% CI    | <i>p</i> -value | AOR <sup>2</sup>      | 95% CI     | <i>p</i> -value |
| Annual Household Income |                   |           |                 |                       |            |                 |
| <30,000                 | 0.72              | 0.64–0.80 | <0.001          | 0.86                  | 0.82–0.90  | <0.001          |
| 30–49,999               | 0.84              | 0.77–0.91 | <0.001          | 0.95                  | 0.91–0.99  | 0.01            |
| 50–74,999               | REF               | --        | --              | REF                   | --         | --              |
| 75–99,999               | 1.10              | 1.02–1.18 | 0.05            | 1.06                  | 1.02–1.10  | 0.01            |
| 100–150,000             | 1.29              | 1.21–1.27 | <0.001          | 1.10                  | 1.06–1.14  | <0.001          |
| >150,000                | 1.66              | 1.54–1.78 | <0.001          | 1.20                  | 1.16–1.24  | <0.001          |
| Missing                 | 1.14              | 1.09–1.19 | 0.05            | 1.06                  | 1.01–1.11  | 0.05            |
| Age (years)             |                   |           |                 |                       |            |                 |
| 18–34                   | 0.85              | 0.78–0.92 | <0.001          | 0.87                  | 0.83–0.91  | <0.001          |
| 35–44                   | 1.02              | 0.95–1.09 | 1.0             | 0.93                  | 0.90–0.96  | <0.001          |
| 45–54                   | REF               | --        | --              | REF                   | --         | --              |
| 55–64                   | 1.21              | 1.11–1.31 | <0.001          | 0.99                  | 0.95–1.03  | 1.00            |
| ≥65                     | 1.56              | 1.46–1.66 | <0.001          | 1.19                  | 1.15–1.23  | <0.001          |
| Missing                 | --                | --        | --              | 0.08                  | -2.32–2.48 | 0.05            |
| Race                    |                   |           |                 |                       |            |                 |
| White                   | REF               | -         | --              | REF                   | --         | --              |
| Black                   | 0.60              | 0.53–0.63 | <0.001          | 0.85                  | 0.82–0.88  | <0.001          |
| Hispanic                | 0.83              | 0.75–0.90 | <0.001          | 0.97                  | 0.93–1.01  | 0.10            |
| Asian                   | 0.98              | 0.89–1.07 | 1.00            | 0.96                  | 0.91–1.01  | 1.00            |
| Other                   | 0.74              | 0.64–0.84 | <0.001          | 0.95                  | 0.90–1.00  | 0.05            |
| Essential Worker        |                   |           |                 |                       |            |                 |
| Yes                     | REF               | --        | --              | REF                   | --         | --              |
| No                      | 1.72              | 1.67–1.77 | <0.001          | 1.06                  | 1.04–1.08  | <0.001          |
| Missing                 | 1.07              | 0.68–1.46 | 1.0             | 1.28                  | 1.16–1.40  | <0.001          |
| Health Insurance        |                   |           |                 |                       |            |                 |
| Plan through employer   | REF               | --        | --              | REF                   | --         | --              |
| Medicare                | 0.66              | 0.56–0.76 | <0.001          | 0.95                  | 0.91–0.99  | 0.05            |
| Self-purchased plan     | 0.81              | 0.74–0.88 | <0.001          | 0.99                  | 0.96–1.02  | 1.00            |
| Medicaid or Medi-Cal    | 0.60              | 0.50–0.70 | <0.001          | 0.90                  | 0.84–0.96  | <0.001          |
| Tricare                 | 0.90              | 0.72–1.08 | 1.0             | 1.10                  | 1.02–1.18  | 0.05            |
| Other                   | 0.70              | 0.61–0.79 | <0.001          | 0.85                  | 0.82–0.88  | <0.001          |
| Uninsured               | 0.56              | 0.46–0.66 | <0.001          | 0.74                  | 0.69–0.79  | <0.001          |
| Missing                 | --                | --        | --              | 0.92                  | 0.82–1.02  | 0.10            |
| Political Party         |                   |           |                 |                       |            |                 |
| Republican              | 0.78              | 0.72–0.84 |                 | 0.92                  | 0.89–0.95  | <0.001          |
| Democrat                | REF               | --        | --              | REF                   | --         | --              |
| Independent             | 0.85              | 0.80–0.90 |                 | 0.94                  | 0.91–0.97  | <0.001          |
| Missing                 | 0.79              | 0.69–0.89 |                 | 0.89                  | 0.84–0.94  | <0.001          |

<sup>a</sup> Adjusted odds ratio (AOR); adjusted for annual income, age, race, essential worker status, health insurance coverage, and political party.

**Table S4.** COVID-19 Vaccination Initiation and Completion Rates by Demographics, Prior to Approval and Administration of Viral-Vector Vaccine <sup>a</sup>.

| Demographic | Dose Initiation <sup>b</sup><br>(95% MOE) <sup>c</sup> | Dose Completion <sup>b</sup><br>(95% MOE) <sup>c</sup> |
|-------------|--------------------------------------------------------|--------------------------------------------------------|
|             |                                                        |                                                        |
| Age (years) |                                                        |                                                        |

|                         |                         |                         |
|-------------------------|-------------------------|-------------------------|
| 18–34                   | 9.7(9.1–10.2)           | 64.9 (62.5–67.3)        |
| 35–44                   | 12.8 (12.1–13.5)        | 62.1 (60.0–64.2)        |
| 45–54                   | 15.9 (15.3–16.5)        | 62.6 (60.9–64.3)        |
| 55–64                   | 20.1 (19.4–20.8)        | 56.1 (54.6–57.6)        |
| ≥65                     | 52.6 (51.8–53.4)        | 47.7 (46.7–48.8)        |
| Missing                 | Suppressed <sup>d</sup> | Suppressed <sup>d</sup> |
| Race                    |                         |                         |
| White                   | 23.1 (22.7–23.5)        | 54.1 (53.3–54.9)        |
| Black                   | 15.4 (14.5–16.3)        | 53.2 (50.7–55.7)        |
| Hispanic                | 15.2 (14.2–16.2)        | 52.9 (50.0–55.8)        |
| Asian                   | 21.8 (20.1–23.5)        | 62.5 (59.3–65.7)        |
| Other                   | 15.6 (14.3–16.9)        | 56.9 (53.3–60.5)        |
| Essential Worker        |                         |                         |
| Yes                     | 19.9 (19.4–20.4)        | 65.1 (64.1–66.2)        |
| No                      | 16.0 (15.4–16.6)        | 46.6 (44.7–48.5)        |
| Missing                 | 17.4 (12.5–22.4)        | 58.0 (44.4–71.6)        |
| Annual Household Income |                         |                         |
| <30,000                 | 11.5 (10.9–12.1)        | 53.1 (50.7–55.5)        |
| 30–49,999               | 18.3 (17.4–19.2)        | 48.9 (46.8–51.0)        |
| 50–74,999               | 22.1 (21.2–23.0)        | 53.5 (51.7–55.3)        |
| 75–99,999               | 24.4 (23.4–25.4)        | 52.7 (50.8–54.6)        |
| 100–150,000             | 26.5 (25.6–27.4)        | 56.8 (55.2–58.4)        |
| >150,000                | 28.6 (27.6–29.6)        | 59.7 (8.1–61.3)         |
| Missing                 | 27.8 (26.3–29.3)        | 56.7 (54.2–59.2)        |
| Health Insurance        |                         |                         |
| Plan through employer   | 18.6 (18.1–19.1)        | 59.9 (58.9–60.9)        |
| Medicare                | 37.5 (36.6–38.4)        | 48.1 (46.9–49.4)        |
| Self-purchased plan     | 17.8 (16.8–18.8)        | 57.8 (55.4–60.2)        |
| Medicaid or Medi-Cal    | 8.1 (7.2–9.1)           | 51.9 (47.1–56.7)        |
| Tricare                 | 24.7 (21.9–27.5)        | 54.0 (48.6–59.4)        |
| Other                   | 18.3 (16.9–19.7)        | 52.8 (49.6–56.0)        |
| Uninsured               | 6.1 (5.2–7.0)           | 60.1 (54.3–65.9)        |
| Missing                 | Suppressed *            | Suppressed *            |
| Political Party         |                         |                         |
| Republican              | 21.1 (20.3–21.9)        | 57.2 (55.5–58.9)        |
| Democrat                | 23.7 (23.1–24.3)        | 52.2 (51.0–53.4)        |
| Independent             | 16.8 (16.2–17.4)        | 55.2 (53.7–56.7)        |
| Missing                 | 20.4 (18.8–22.0)        | 54.9 (51.2–58.6)        |

<sup>a</sup> Survey responses 8 February to 7 March 2021; <sup>b</sup> rates are weighted for gender, age, race, education, geography, profession, and political identification to match national general population; <sup>c</sup> margin of error (MOE); <sup>d</sup>sub-groups with insufficient numbers of responses were suppressed.

**Table S5.** COVID-19 Vaccination Completion Rates by Demographics, among Subset who Reported Receiving an mRNA formula of the Vaccine <sup>a</sup>.

| Demographic | Dose Completion <sup>b</sup><br>(95% MOE) <sup>c</sup> |
|-------------|--------------------------------------------------------|
| Age (years) |                                                        |
| 18–34       | 81.7 (81.3–82.1)                                       |
| 35–44       | 83.9 (83.5–84.3)                                       |
| 45–54       | 85.7 (85.4–86.0)                                       |
| 55–64       | 86.5 (86.2–86.8)                                       |
| ≥ 65        | 91.2 (91.0–91.4)                                       |

|                         |                         |
|-------------------------|-------------------------|
| Missing                 | Suppressed <sup>d</sup> |
| Race                    |                         |
| White                   | 87.2 (87.0–87.4)        |
| Black                   | 83.2 (82.7–83.7)        |
| Hispanic                | 82.9 (82.4–83.4)        |
| Asian                   | 85.8 (85.1–86.5)        |
| Other                   | 85.3 (84.5–86.1)        |
| Essential Worker        |                         |
| Yes                     | 86.3 (86.1–86.5)        |
| No                      | 85.4 (85.1–85.7)        |
| Missing                 | 87.5 (85.5–89.5)        |
| Annual Household Income |                         |
| <30,000                 | 81.4 (80.9–81.9)        |
| 30–49,999               | 84.7 (84.3–85.1)        |
| 50–74,999               | 86.3 (85.9–86.7)        |
| 75–99,999               | 87.1 (86.7–87.5)        |
| 100–150,000             | 87.8 (88.4–89.0)        |
| >150,000                | 88.7 (88.4–89.0)        |
| Missing                 | 87.6 (87.1–88.1)        |
| Health Insurance        |                         |
| Plan through employer   | 86.4 (86.2–86.6)        |
| Medicare                | 89.1 (88.8–89.4)        |
| Self-purchased plan     | 85.6 (85.1–86.1)        |
| Medicaid or Medi-Cal    | 79.6 (78.8–80.4)        |
| Tricare                 | 87.1 (86.0–88.2)        |
| Other                   | 83.9 (83.2–84.6)        |
| Uninsured               | 78.3 (77.3–79.3)        |
| Missing                 | 83.6 (82.0–85.2)        |
| Political Party         |                         |
| Republican              | 86.4 (86.1–86.7)        |
| Democrat                | 86.6 (86.4–86.8)        |
| Independent             | 85.0 (84.7–85.3)        |
| Missing                 | 85.3 (84.6–86.0)        |

---

<sup>a</sup> Survey responses beginning 7 March 2021 and restricted to those who answered an additional question about type of vaccine with an mRNA formulation; <sup>b</sup> rates are weighted for gender, age, race, education, geography, profession, and political identification to match national general population; <sup>c</sup> margin of error (MOE); <sup>d</sup> sub-groups with insufficient numbers of responses were suppressed.
